# Supplementary material for: Flap dynamics of plasmepsin proteases: insight into proposed parameters and molecular dynamics
Source: Royal Society of Chemistry journal article supplement (doi:10.1039/c4mb00631c), 2015-01-23
Supplement: c4mb00631c1.pdf [file c4mb00631c1.pdf]

## **Supplementary Informations**

### **Flap Dynamics of Plasmepsin Proteases: Proposed Parameters and Molecular Dynamics Insight**

Wilson Karubiu<sup>a</sup>, Soumendranath Bhakat <sup>a</sup>, Lara McGillewie and Mahmoud E.S. Soliman <sup>a\*</sup>

<sup>a</sup>School of Health Sciences, University of KwaZulu-Natal, Westville, Durban-4000, South  
Africa

\*Corresponding author: Mahmoud E. S. Soliman (email: [soliman@ukzn.ac.za](mailto:soliman@ukzn.ac.za) )

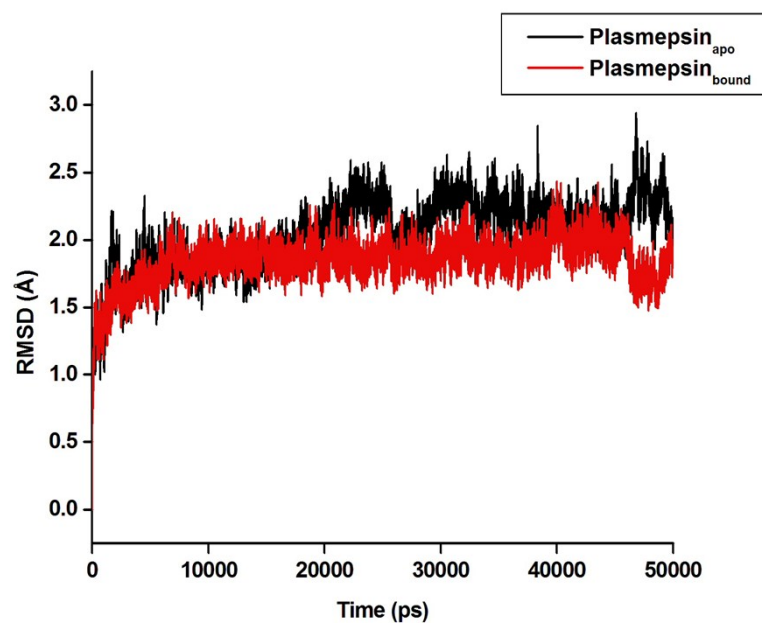

**Figure S1.** The RMSD fluctuation during the simulation time for both apo (black) and bound (red) conformations. The RMSD was calculated taking in account C- $\alpha$  atoms of the systems.

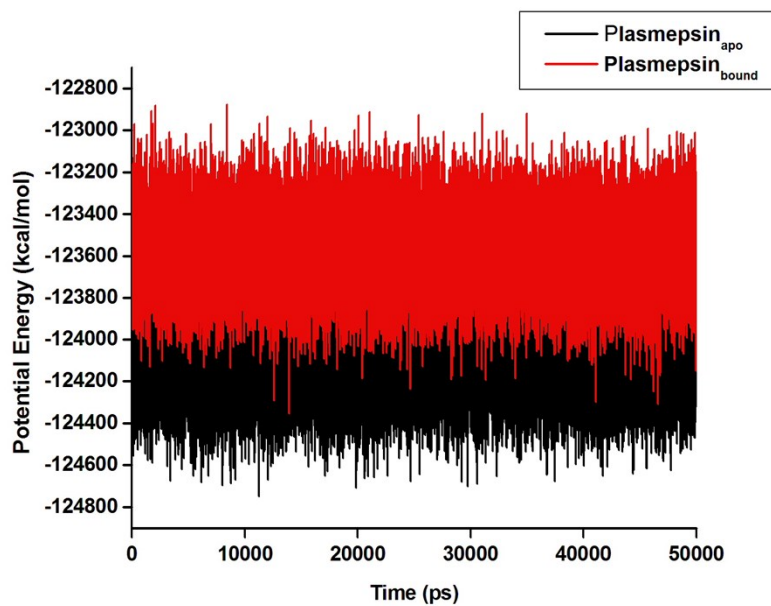

**Figure S2.** The potential energy fluctuations for both apo (black) and bound (red) conformations during simulation time.

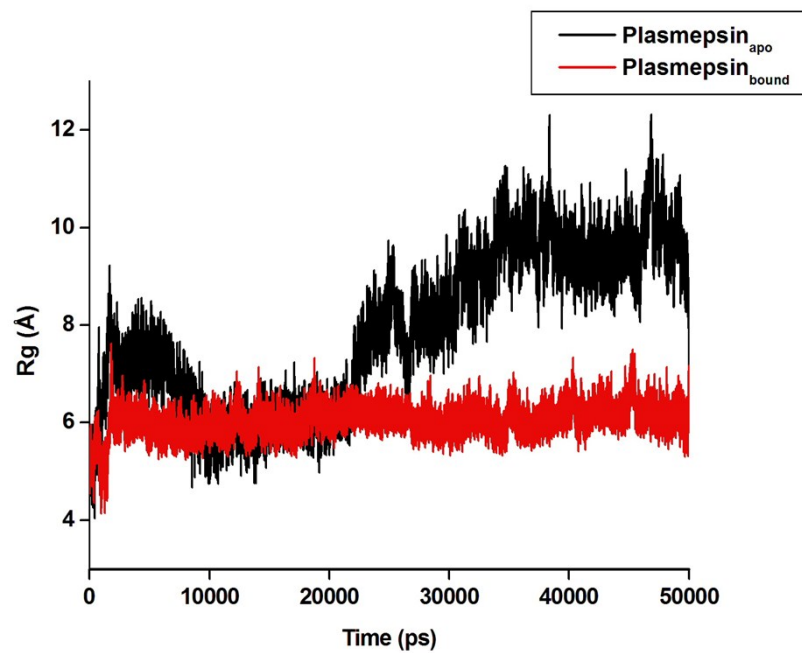

**Figure S3.** The fluctuation in radius of gyration (Rg) for apo and bound conformations of plasmepsin taking in account C- $\alpha$  atoms of flap tip residues, Val78 and Leu292.
